# Supplementary material for: Highly active and stable RuO2/MgF2 catalysts for efficient HCl oxidation in the fluorochemical industry
Source: Royal Society of Chemistry journal article supplement (doi:10.1039/d3cy01749d), 2024-01-01
Supplement: d3cy01749d1.pdf [file d3cy01749d1.pdf]

*Electronic Supplementary Information*

**Highly active and stable RuO<sub>2</sub>/MgF<sub>2</sub> catalysts for efficient HCl oxidation in the fluorochemical industry**

Yufeng Gong<sup>†,a</sup>, Siheng Nie<sup>†,a</sup>, Honglin Ji<sup>a</sup>, Linying Fu<sup>a</sup>, Rui Ma<sup>a,b,\*</sup>, Xinqing Lu<sup>a,b</sup>,  
Yanghe Fu<sup>a,b</sup>, Weidong Zhu<sup>a,b,c,\*</sup>

<sup>a</sup> *Zhejiang Engineering Laboratory for Green Syntheses and Applications of Fluorine-Containing Specialty Chemicals, Institute of Advanced Fluorine-Containing Materials, Zhejiang Normal University, 321004 Jinhua, People's Republic of China*

<sup>b</sup> *Key Laboratory of the Ministry of Education for Advanced Catalysis Materials, Institute of Physical Chemistry, Zhejiang Normal University, 321004 Jinhua, People's Republic of China*

<sup>c</sup> *National Engineering Technology Research Center of Fluoro-Materials, Zhejiang Juhua Technology Center Co., Ltd., 324004 Quzhou, People's Republic of China*

<sup>†</sup>These authors contributed equally to this work.

\*To whom correspondence should be addressed.

Tel./Fax: +86 579 82282234; E-mail: [mr@zjnu.cn](mailto:mr@zjnu.cn) (R. Ma);

Tel./Fax: +86 579 82282932; E-mail: [weidongzhu@zjnu.cn](mailto:weidongzhu@zjnu.cn) (W. Zhu)

## Models for the kinetic adsorption of Ru ions on MgF<sub>2</sub>-SRT supports

### Evaluation on mass transfer limitations

**Table S1.** Extracted parameter values for the kinetic adsorption of Ru ions on MgF<sub>2</sub>-SRT supports at 30.0 °C.

**Table S2.** Measured reaction rates over RuO<sub>2</sub>/MgF<sub>2</sub>-SRT catalysts at different reaction temperatures for  $E_a$  calculations.

**Table S3.** Data for calculating the Mears ( $C_M$ ) and Weisz-Prater ( $C_{WP}$ ) criterion parameters.

**Table S4.** Evaluation on the Mears and Weisz-Prater criterion parameters.

**Fig. S1.** Adsorption-desorption isotherms of N<sub>2</sub> on MgF<sub>2</sub>-SRT supports at -196.0 °C.

**Fig. S2.** SEM images of MgF<sub>2</sub>-SRT supports.

**Fig. S3.** Ru 3d XPS spectra of RuO<sub>2</sub>/MgF<sub>2</sub>-SRT catalysts.

**Fig. S4.** Raman spectra of RuO<sub>2</sub>/MgF<sub>2</sub>-SRT catalysts.

**Fig. S5.** TEM (A) and HRTEM (B) images of RuO<sub>2</sub>/MgF<sub>2</sub>-1 catalyst.

**Fig. S6.** H<sub>2</sub>-TPR curves at different heating rates for RuO<sub>2</sub>/MgF<sub>2</sub>-SRT catalysts and the Kissinger plots for the reduction peaks of RuO<sub>2</sub>/MgF<sub>2</sub>-SRT catalysts. The apparent activation energy of the Ru-O bond dissociation was calculated by the Kissinger equation.

**Fig. S7.** Differential adsorption heat of O<sub>2</sub> on RuO<sub>2</sub>/MgF<sub>2</sub>-SRT as a function of O<sub>2</sub> coverage ( $\theta$ ) at 40.0 °C.

**Fig. S8.** HCl conversion as a function of time on stream over RuO<sub>2</sub>/MgF<sub>2</sub>-SRT catalysts.

Reaction conditions: 350.0 °C and a GHSV of 48,000.0 mL (STP)·(h·g<sub>catal</sub>)<sup>-1</sup>.

**Fig. S9.** XRD pattern of the used RuO<sub>2</sub>/MgF<sub>2</sub>-1 catalyst.

**Fig. S10.** TEM (C) and HRTEM (D) images of the used RuO<sub>2</sub>/MgF<sub>2</sub>-1 catalyst.

**Fig. S11.** Raman spectrum of the used RuO<sub>2</sub>/MgF<sub>2</sub>-1 catalyst.

**Fig. S12.** Ru 3d (A) and Cl 2p (B) XPS spectra of the used RuO<sub>2</sub>/MgF<sub>2</sub>-1 catalyst.

## Models for the kinetic adsorption of Ru ions on MgF<sub>2</sub>-SRT supports

To quantitatively analyze the adsorption kinetics of Ru ions on MgF<sub>2</sub>-SRT supports, the plots of  $q_t$  versus  $t$  were further analyzed by employing the pseudo first-order and pseudo second-order models as shown in Equations (S1) and (S2) [1].

Pseudo first-order model:

$$\ln(q_e - q_t) = \ln q_e - k_1 t \quad (\text{S1})$$

Pseudo second-order model:

$$\frac{t}{q_t} = \frac{1}{k_2 q_e^2} + \frac{t}{q_t} \quad (\text{S2})$$

where  $q_t$  and  $q_e$  in  $\mu\text{mol}\cdot\text{g}^{-1}$  are the adsorption amounts of Ru ions at time  $t$  and equilibrium, respectively,  $t$  represents the contact time (min), and  $k_1$  ( $\text{min}^{-1}$ ) and  $k_2$  ( $\text{g}\cdot\mu\text{mol}^{-1}\cdot\text{min}^{-1}$ ) are denoted as the rate constants for the above two models, respectively.

## Reference

1. S. S. Gupta, K.G. Bhattacharyya, *Adv. Colloid Interface Sci.*, 2011, **162**, 39-58.

## Evaluation on mass transfer limitations

The influence of mass transfer limitations on reaction kinetics was evaluated using the Mears ( $C_M$ ) and Weisz-Prater ( $C_{WP}$ ) criteria, which were calculated using Equations (S3) and (S4), respectively [1,2].

$$C_M = \frac{n \cdot r_{\text{obs}} \cdot \rho_{\text{cat}} \cdot R_{\text{cat}}}{k_c \cdot C_{\text{HCl}}} \quad (\text{S3})$$

$$C_{WP} = \frac{r_{\text{obs}} \cdot \rho_{\text{cat}} \cdot R_{\text{cat}}^2}{D_{\text{eff}} \cdot C_{\text{HCl},s}} \quad (\text{S4})$$

where  $n$  is the reaction order,  $r_{\text{obs}}$  is the observed reaction rate,  $\rho_{\text{cat}}$  is the bulk density of catalyst bed,  $R_{\text{cat}}$  is the particle radius of catalyst,  $k_c$  is the external mass transfer coefficient,  $C_{\text{HCl}}$  is the bulk concentration of HCl,  $D_{\text{eff}}$  is the effective diffusion coefficient and  $C_{\text{HCl},s}$  is the HCl concentration on the surface of a catalyst particle, which is equal to  $C_{\text{HCl}}$  when the external mass transfer limitation is neglected.

$k_c$  was estimated with Equations (S5)-(S7) by means of similarity numbers such as the Sherwood number  $Sh$ , the Reynolds number of the catalyst pellet  $Re_p$ , and the Schmidt number  $Sc$  [1].

$$Sh = \frac{k_c \cdot d_{\text{cat}}}{D_{\text{eff}}} = 2 + 0.6 \cdot Re_p^{1/2} \cdot Sc^{1/3} \quad (\text{S5})$$

$$Re_p = \frac{U \cdot \rho \cdot d_{\text{cat}}}{\mu} \quad (\text{S6})$$

$$Sc = \frac{\mu}{D_{\text{eff}} \cdot \rho} \quad (\text{S7})$$

where  $d_{\text{cat}}$  is the diameter of a catalyst particle,  $U$  is the free-stream velocity,  $\rho$  and  $\mu$  are the density and viscosity of a feed mixture, which can be determined from Aspen Plus software.

$D_{\text{eff}}$  was estimated with Equations (S8)-(S11) using the coefficients for Knudsen

diffusion  $D_A^K$  and bulk diffusion  $D_A^b$  [1].

$$\frac{1}{D_{\text{eff}}} = \frac{1}{D_A^K} + \frac{1}{D_A^b} \quad (\text{S8})$$

$$D_A^K = \frac{2}{3} \cdot r_{\text{po}} \cdot \sqrt{\frac{8 \cdot R \cdot T}{\pi \cdot M_i}} \cdot \frac{\varepsilon}{\tau} \quad (\text{S9})$$

$$r_{\text{po}} = 4 \cdot \frac{\varepsilon}{S_{\text{cat}} \cdot \rho_{\text{cat,g}}} \quad (\text{S10})$$

$$D_A^b = D_A \cdot \frac{\varepsilon}{\tau} \quad (\text{S11})$$

where  $\varepsilon$ ,  $\tau$ ,  $r_{\text{po}}$ ,  $S_{\text{cat}}$ , and  $\rho_{\text{cat,g}}$  are the porosity, tortuosity, average pore radius, surface area, and grain density of catalyst,  $T$  and  $M_i$  are the temperature and relative molecular weight of component  $i$ , and  $D_A$  is the free diffusion coefficient, which can be determined from Aspen Plus software.

The data used in the above-mentioned equations and the calculations of the Mears and Weisz-Prater parameters are given in Tables S3 and S4. Apparently,  $C_M/n$  is less than 0.15 while  $n$  ranges from 1 to 2, implying that there is no external mass-transfer limitation. In addition,  $C_{\text{WP}}$  is much less than 1 at different temperatures, indicating that the internal diffusion limitations can be neglected.

## References:

1. H. S. Fogler, *Diffusion and reaction in elements of chemical reaction engineering*, Pearson Education Inc.: New York, 2016, pp 734-743.
2. T. R. Marrero, E.A. Mason, *J. Phys. Chem. Ref. Data*, 1972, **1**, 1-118.

**Table S1.** Extracted parameter values for the kinetic adsorption of Ru ions on MgF<sub>2</sub>-SRT supports at 30.0 °C

| Support              | Pseudo first-order parameters         |                       |       | Pseudo second-order parameters        |                                                           |       |
|----------------------|---------------------------------------|-----------------------|-------|---------------------------------------|-----------------------------------------------------------|-------|
|                      | $q_e$                                 | $k_1$                 | $R^2$ | $q_e$                                 | $k_2$                                                     | $R^2$ |
|                      | ( $\mu\text{mol}\cdot\text{g}^{-1}$ ) | ( $\text{min}^{-1}$ ) |       | ( $\mu\text{mol}\cdot\text{g}^{-1}$ ) | ( $\text{g}\cdot\mu\text{mol}^{-1}\cdot\text{min}^{-1}$ ) |       |
| MgF <sub>2</sub> -1  | 117                                   | 0.51                  | 0.834 | 120                                   | 0.63                                                      | 0.993 |
| MgF <sub>2</sub> -8  | 101                                   | 0.43                  | 0.786 | 104                                   | 0.52                                                      | 0.996 |
| MgF <sub>2</sub> -24 | 75                                    | 0.38                  | 0.802 | 77                                    | 0.41                                                      | 0.995 |
| MgF <sub>2</sub> -36 | 56                                    | 0.32                  | 0.819 | 58                                    | 0.34                                                      | 0.995 |

**Table S2.** Measured reaction rates over RuO<sub>2</sub>/MgF<sub>2</sub>-SRT catalysts at different reaction temperatures for  $E_a$  calculations<sup>a</sup>

| Catalyst                               | Temperature<br>(°C) | HCl conversion<br>(%) | Reaction rate<br>( $\times 10^{-4}$ mol·g <sup>-1</sup> ·s <sup>-1</sup> ) |
|----------------------------------------|---------------------|-----------------------|----------------------------------------------------------------------------|
| RuO <sub>2</sub> /MgF <sub>2</sub> -1  | 305                 | 1.58                  | 7.9                                                                        |
|                                        | 315                 | 1.86                  | 9.3                                                                        |
|                                        | 325                 | 1.96                  | 9.8                                                                        |
|                                        | 335                 | 2.28                  | 11.4                                                                       |
|                                        | 345                 | 2.71                  | 13.6                                                                       |
|                                        | 355                 | 3.62                  | 18.1                                                                       |
| RuO <sub>2</sub> /MgF <sub>2</sub> -8  | 305                 | 1.27                  | 6.4                                                                        |
|                                        | 315                 | 1.48                  | 7.4                                                                        |
|                                        | 325                 | 1.79                  | 9.0                                                                        |
|                                        | 335                 | 2.10                  | 10.5                                                                       |
|                                        | 345                 | 2.47                  | 12.4                                                                       |
|                                        | 355                 | 3.10                  | 15.5                                                                       |
| RuO <sub>2</sub> /MgF <sub>2</sub> -24 | 305                 | 0.94                  | 4.7                                                                        |
|                                        | 315                 | 1.13                  | 5.7                                                                        |
|                                        | 325                 | 1.45                  | 7.3                                                                        |
|                                        | 335                 | 1.69                  | 8.5                                                                        |
|                                        | 345                 | 1.94                  | 9.7                                                                        |



|                                        |     |      |      |
|----------------------------------------|-----|------|------|
|                                        | 355 | 2.24 | 11.2 |
|                                        | 305 | 0.84 | 4.2  |
|                                        | 315 | 1.03 | 5.2  |
|                                        | 325 | 1.16 | 5.8  |
| RuO <sub>2</sub> /MgF <sub>2</sub> -36 | 335 | 1.29 | 6.5  |
|                                        | 345 | 1.49 | 7.5  |
|                                        | 355 | 1.77 | 8.9  |

<sup>a</sup> The different, high gas hourly space velocities were set in order to maintain HCl conversions always below 10%, and the reaction rates were measured after 1 h of the oxidation reaction.

**Table S3.** Data for calculating the Mears and Weisz-Prater criterion parameters

| Parameters            | Values                   |
|-----------------------|--------------------------|
| $\rho_{\text{cat}}$   | 806 kg·m <sup>-3</sup>   |
| $R_{\text{cat}}$      | 0.20 mm                  |
| $\rho_{\text{cat,g}}$ | 3,074 kg·m <sup>-3</sup> |
| $\varepsilon$         | 0.65                     |
| $\tau^{\text{a}}$     | 3                        |

<sup>a</sup> The pore tortuosity was assumed to be 3 for a spherical catalyst particle.

**Table S4.** Evaluation on the Mears ( $C_M$ ) and Weisz-Prater ( $C_{WP}$ ) criterion parameters

| Catalyst                               | Temperature (°C) | $C_M$                | $C_{WP}$             |
|----------------------------------------|------------------|----------------------|----------------------|
| RuO <sub>2</sub> /MgF <sub>2</sub> -1  | 325              | $4.5 \times 10^{-3}$ | $1.8 \times 10^{-2}$ |
|                                        | 335              | $5.5 \times 10^{-3}$ | $2.2 \times 10^{-2}$ |
|                                        | 345              | $6.9 \times 10^{-3}$ | $2.7 \times 10^{-2}$ |
|                                        | 355              | $8.9 \times 10^{-3}$ | $3.5 \times 10^{-2}$ |
| RuO <sub>2</sub> /MgF <sub>2</sub> -8  | 325              | $5.6 \times 10^{-3}$ | $2.2 \times 10^{-2}$ |
|                                        | 335              | $6.5 \times 10^{-3}$ | $2.6 \times 10^{-2}$ |
|                                        | 345              | $7.5 \times 10^{-3}$ | $3.0 \times 10^{-2}$ |
|                                        | 355              | $8.8 \times 10^{-3}$ | $3.5 \times 10^{-2}$ |
| RuO <sub>2</sub> /MgF <sub>2</sub> -24 | 325              | $7.4 \times 10^{-3}$ | $3.1 \times 10^{-2}$ |
|                                        | 335              | $8.6 \times 10^{-3}$ | $3.6 \times 10^{-2}$ |
|                                        | 345              | $9.9 \times 10^{-3}$ | $4.1 \times 10^{-2}$ |
|                                        | 355              | $1.1 \times 10^{-2}$ | $4.7 \times 10^{-2}$ |
| RuO <sub>2</sub> /MgF <sub>2</sub> -36 | 325              | $5.8 \times 10^{-3}$ | $2.4 \times 10^{-2}$ |
|                                        | 335              | $6.7 \times 10^{-3}$ | $2.7 \times 10^{-2}$ |
|                                        | 345              | $8.1 \times 10^{-3}$ | $3.3 \times 10^{-2}$ |
|                                        | 355              | $9.7 \times 10^{-3}$ | $3.9 \times 10^{-2}$ |

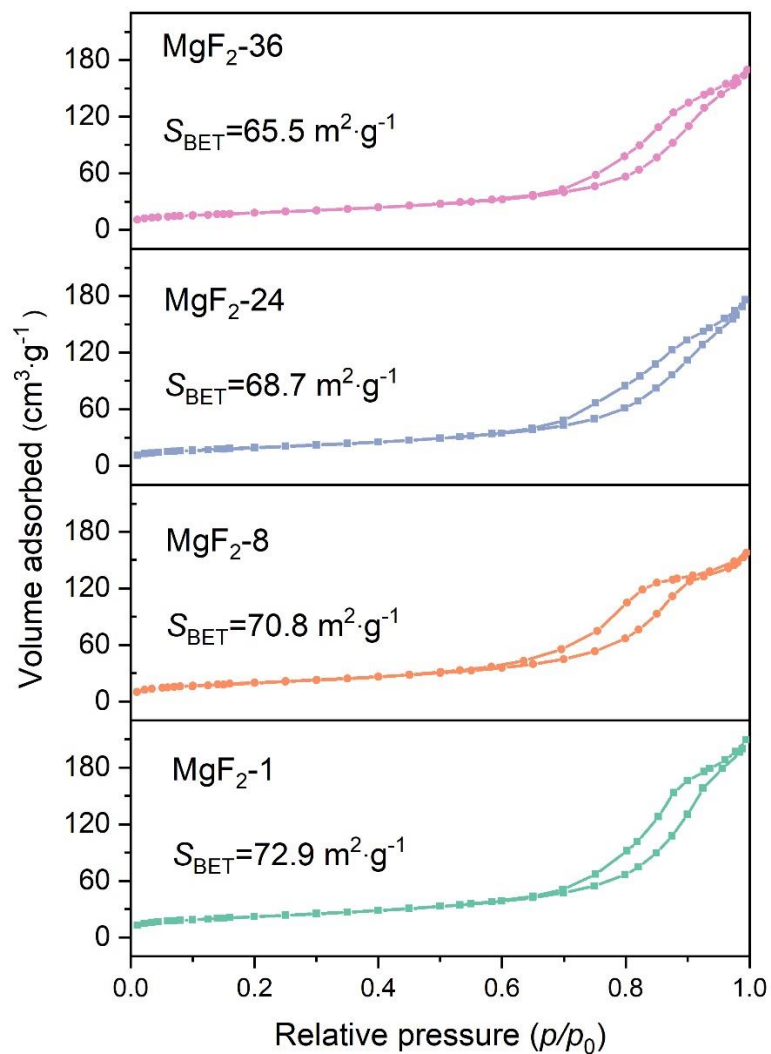

**Fig. S1.** Adsorption-desorption isotherms of N<sub>2</sub> on MgF<sub>2</sub>-SRT supports at -196.0 °C.

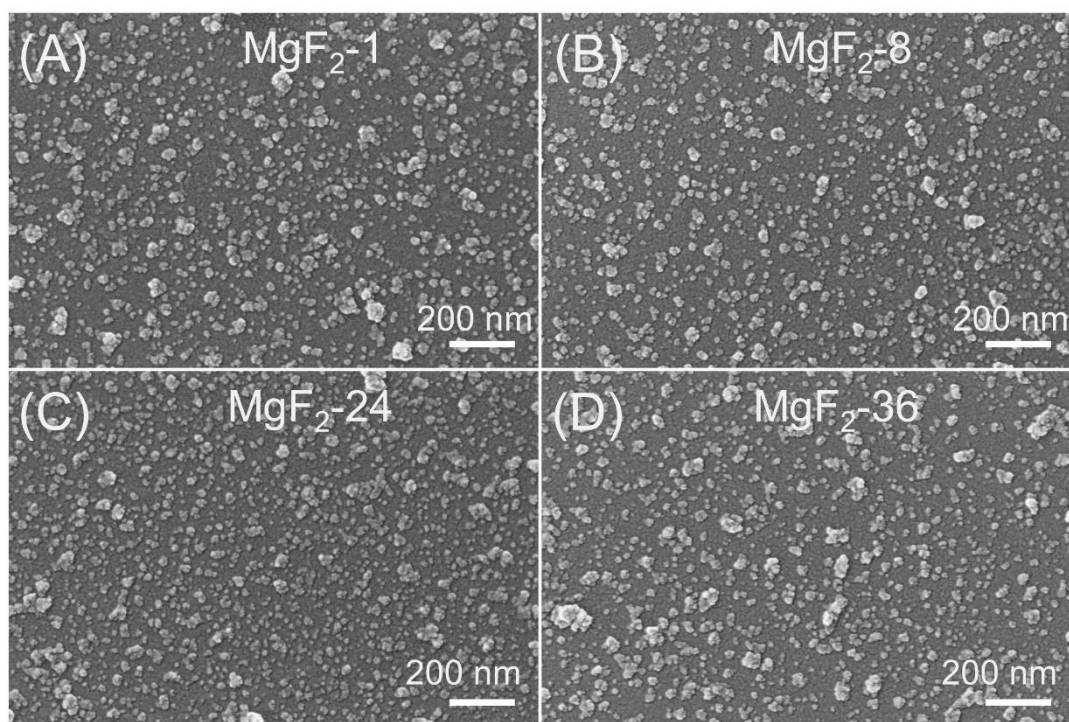

**Fig. S2.** SEM images of MgF<sub>2</sub>-SRT supports.

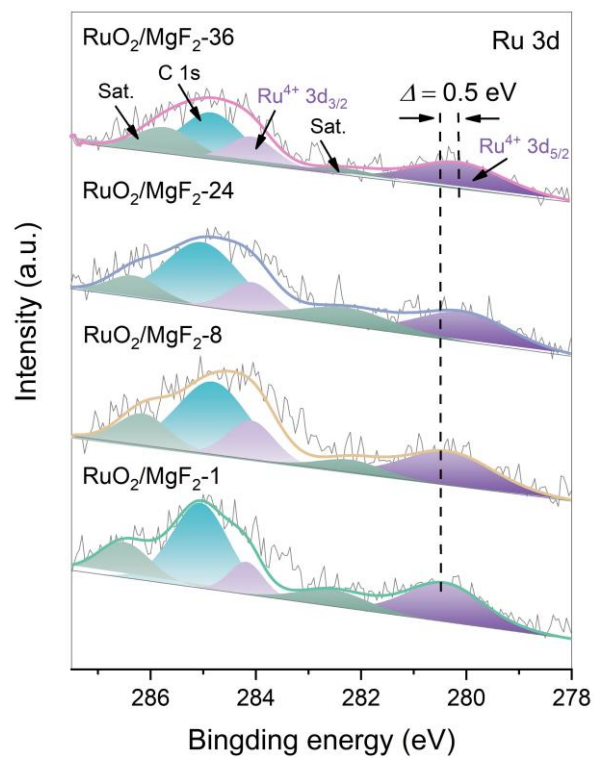

**Fig. S3.** Ru 3d XPS spectra of RuO<sub>2</sub>/MgF<sub>2</sub>-SRT catalysts.

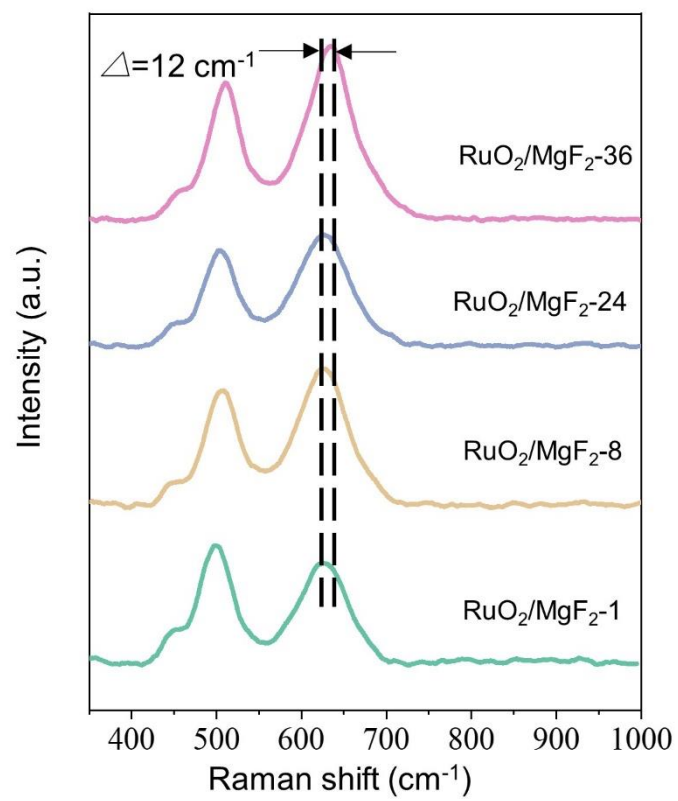

**Fig. S4.** Raman spectra of RuO<sub>2</sub>/MgF<sub>2</sub>-SRT catalysts.

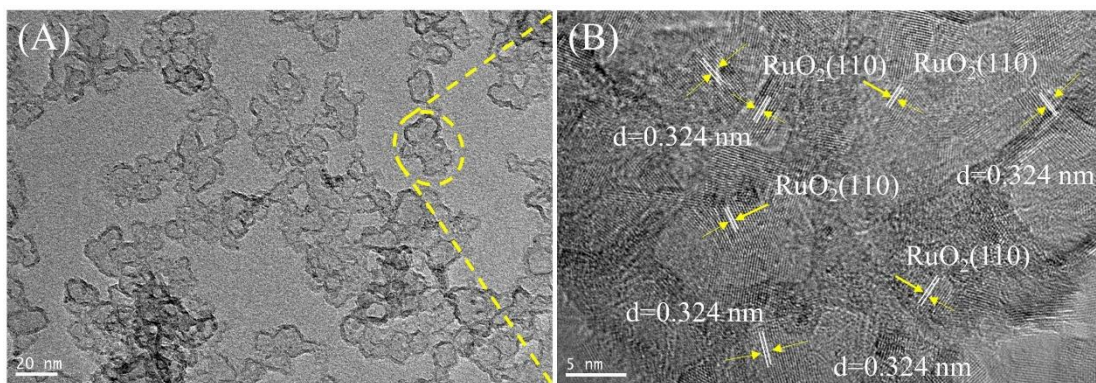

**Fig. S5.** TEM (A) and HRTEM (B) images of RuO<sub>2</sub>/MgF<sub>2</sub>-1 catalyst.



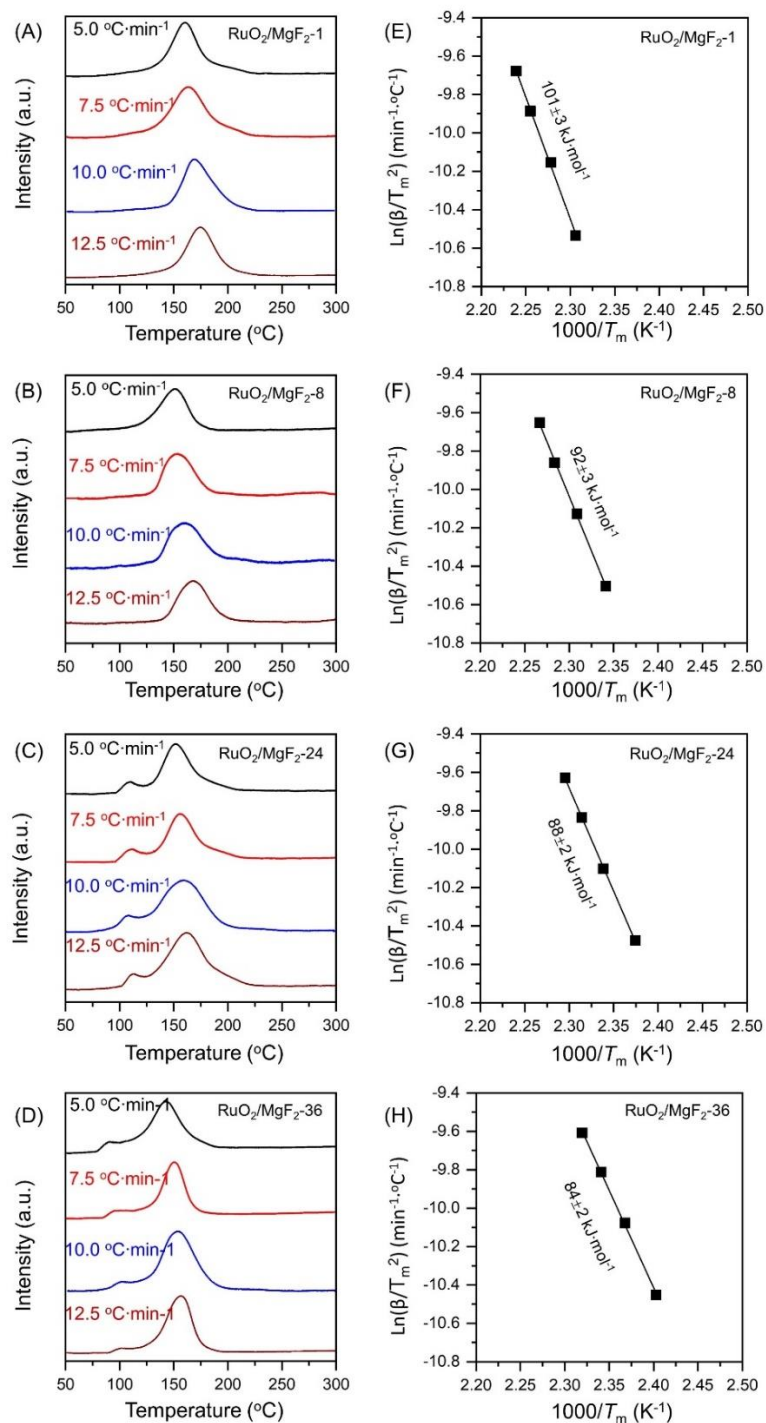

**Fig. S6.** H<sub>2</sub>-TPR curves at different heating rates for RuO<sub>2</sub>/MgF<sub>2</sub>-SRT catalysts and the Kissinger plots for the reduction peaks of RuO<sub>2</sub>/MgF<sub>2</sub>-SRT catalysts. The apparent activation energy of the Ru-O bond dissociation was calculated by the Kissinger equation.

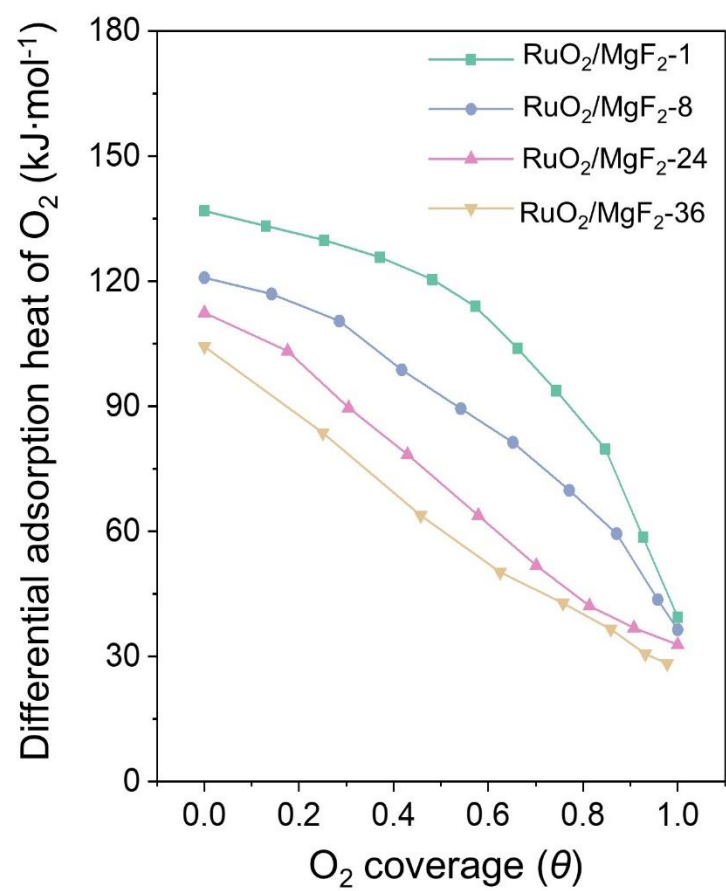

**Fig. S7.** Differential adsorption heat of O<sub>2</sub> on RuO<sub>2</sub>/MgF<sub>2</sub>-SRT as a function of O<sub>2</sub> coverage ( $\theta$ ) at 40.0 °C.

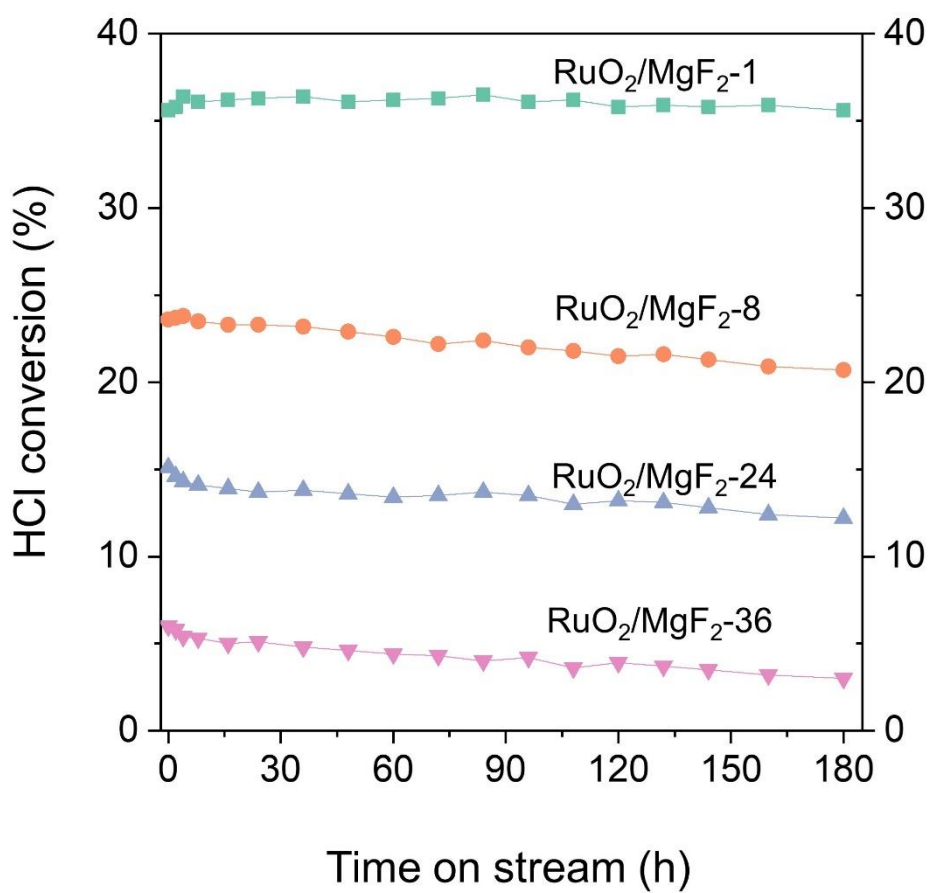

**Fig. S8.** HCl conversion as a function of time on stream over RuO<sub>2</sub>/MgF<sub>2</sub>-SRT catalysts.

Reaction conditions: 350 °C and a GHSV of 48,000.0 mL (STP)·(h·g<sub>catal</sub>)<sup>-1</sup>.

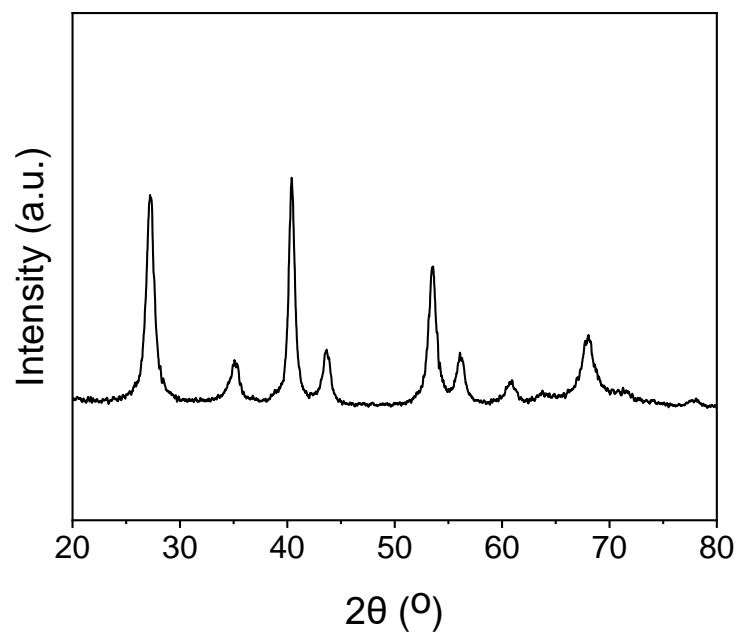

**Fig. S9.** XRD pattern of the used RuO<sub>2</sub>/MgF<sub>2</sub>-1 catalyst.

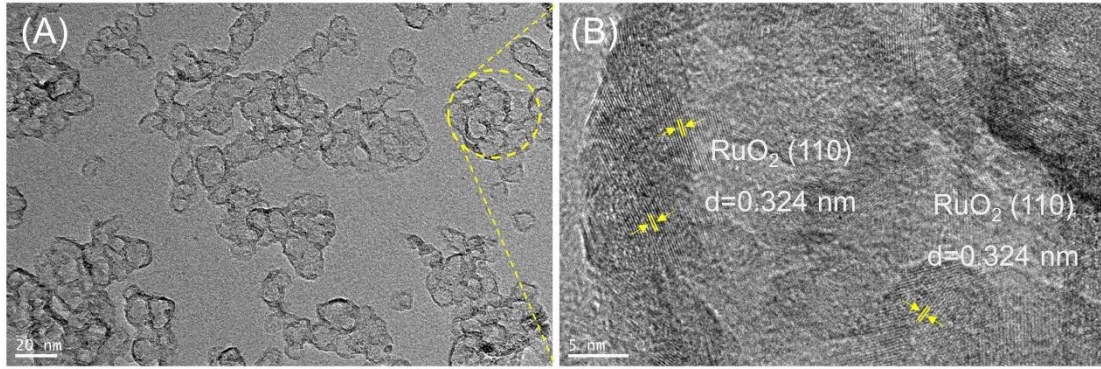

**Fig. S10.** TEM (A) and HRTEM (B) images of the used RuO<sub>2</sub>/MgF<sub>2</sub>-1 catalyst.

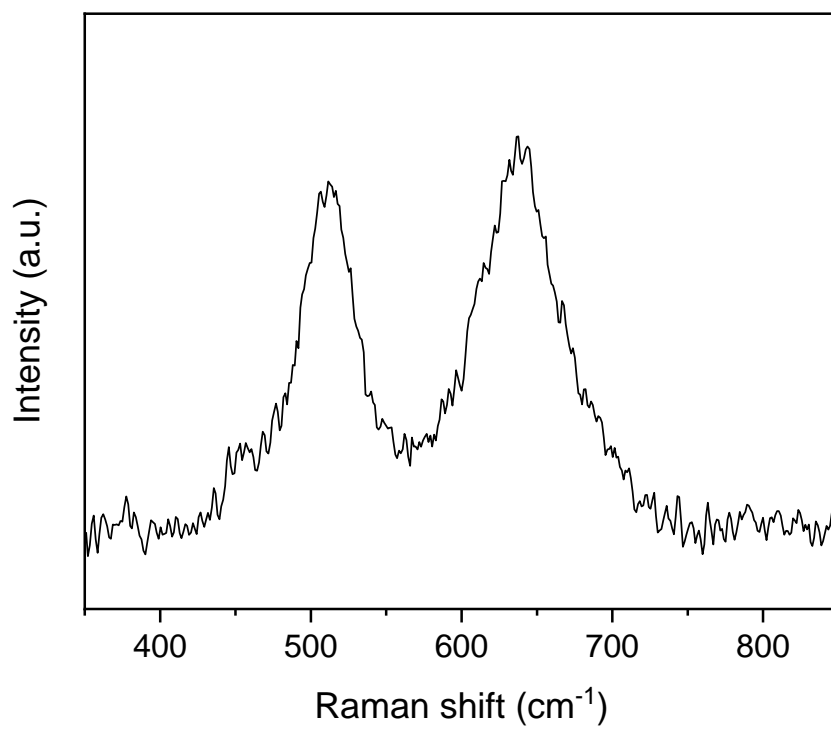

**Fig. S11.** Raman spectrum of the used RuO<sub>2</sub>/MgF<sub>2</sub>-1 catalyst.

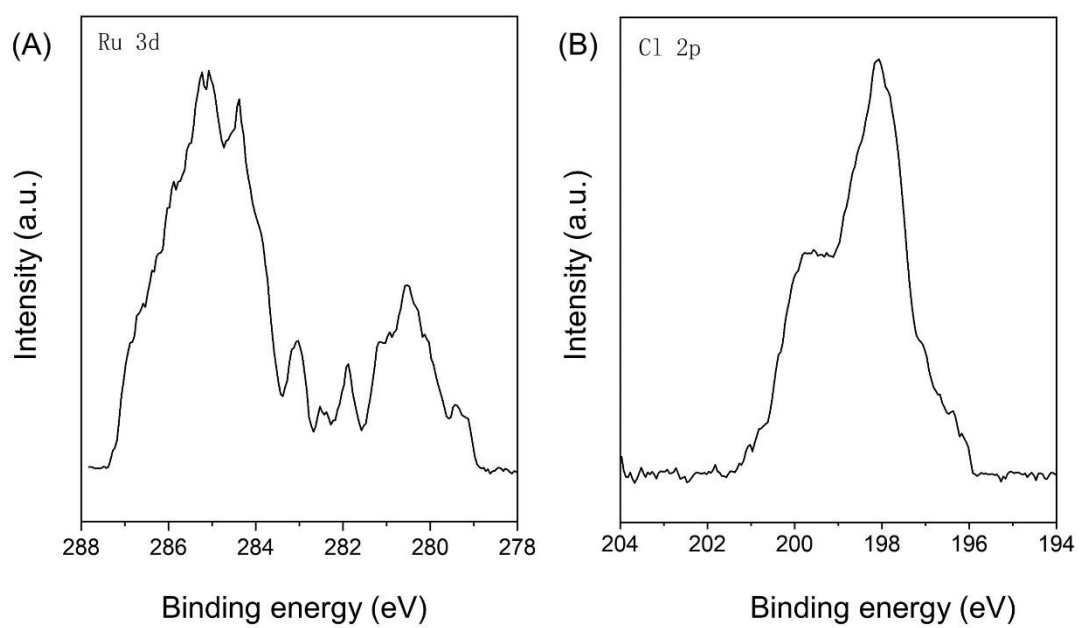

**Fig. S12.** Ru 3d (A) and Cl 2p (B) XPS spectra of the used RuO<sub>2</sub>/MgF<sub>2</sub>-1 catalyst.
